# Supplementary material for: Antioxidant, Gastroprotective, Cytotoxic Activities and UHPLC PDA-Q Orbitrap Mass Spectrometry Identification of Metabolites in Baccharis grisebachii Decoction
Source: MDPI journal article supplement (doi:10.3390/molecules24061085), 2019-03-19
Supplement: s1 [file s1]

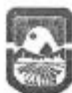

Universidad Nacional de San Luis  
Facultad de Química Bioquímica y Farmacia  
Secretaría de Ciencia y Técnica

"2017 – AÑO DE LAS ENERGÍAS RENOVABLES"  
"Centenario del Natalicio del Poeta Puntano Antonio Esteban AGÜERO"

ES COPIA  
ALBA SUSANA OJEDA  
Jefe Dpto. Desarrollo y T. Entrada  
Fac. Qca. Bqca. y Farmacia  
UNSL

SAN LUIS, 19 OCT 2017

**VISTO:**

El EXP-USL: 12406/2017 mediante el cual la Coordinadora del Comité Institucional de Cuidado y Uso de Animales (C.I.C.U.A.) eleva la nómina de Protocolos de Experimentación Aprobados durante el año 2017, y

**CONSIDERANDO:**

Que los Docentes Investigadores en cumplimiento de las Ordenanzas vigentes han presentado los Protocolos de Experimentación con Animales en tiempo y forma.-

Que el Comité Institucional de Cuidado y Uso de Animales (C.I.C.U.A.) ha revisado, aprobado y elevado dichos Protocolos a la Facultad.-

Que se considera importante su protocolización ya que la mayoría de los Docentes-Investigadores necesitan contar con la misma para publicar en revistas de ámbito Nacional e Internacional.-

Que en la Sesión Ordinaria del 9 de Octubre del corriente año, el Consejo Directivo aprobó por unanimidad la lista de Protocolos de Experimentación con Animales.-

Por ello y en uso de sus atribuciones,

**EL CONSEJO DIRECTIVO DE LA FACULTAD DE  
QUÍMICA, BIOQUÍMICA Y FARMACIA**

**RESUELVE:**

ARTICULO 1º.- Aprobar la nómina de Protocolos de Experimentación realizados durante el año 2017 por Docentes- Investigadores de esta Facultad, según consta en el Anexo Único de la presente disposición.-

ARTICULO 2º.- Comuníquese, insértese en el Libro de Resoluciones de la Facultad publíquese en el Digesto Administrativo de la Universidad y archívese.-

RESOLUCION Nº 296-17

ABL.

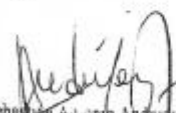  
Dr. Sebastián Antonio Andujar  
Secretaría de Ciencia y Técnica  
Fac. Qca. Bqca. y Farmacia  
UNSL

  
Dra. Mercedes Edith Campderros  
Decana  
Fac. Qca. Bqca. y Farmacia  
UNSL

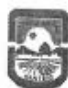

Universidad Nacional de San Luis  
Facultad de Química Bioquímica y Farmacia  
Secretaría de Ciencia y Técnica

"2017 – AÑO DE LAS ENERGÍAS RENOVABLES"  
"Centenario del Natalicio del Poeta Puntano Antonio Esteban AGÜERO"

ES COPIA  
ALBA SUSANA OJEDA  
Jefe Dpto. PS. Entrada  
Fue a la Oficina y Fcha  
U.N.S.L.

|          |           |                               |                                                                                                                   |                               |                                                                                                                                                                                                                 |
|----------|-----------|-------------------------------|-------------------------------------------------------------------------------------------------------------------|-------------------------------|-----------------------------------------------------------------------------------------------------------------------------------------------------------------------------------------------------------------|
| B-282/17 | 8701/2017 | Caviedes<br>vidal,<br>Enrique | Fisiología<br>ecológica de<br>vertebrados                                                                         | Caviedes<br>vidal,<br>Enrique | Efecto de la<br>preferencia/sele<br>cción de dieta<br>sobre el sistema<br>inmunológico<br>en una especie<br>granívora<br>estricta, los<br>diamantes<br>mandarines<br>(Aves,<br><i>Taeniopygia<br/>guttata</i> ) |
| F-283/17 | 9557/2017 | María,<br>Alejandra           | Evaluación<br>farmacológica y<br>toxicológica de<br>productos<br>naturales.<br>Relación<br>estructura-<br>función | Garro,<br>María               | Evaluación del<br>efecto curativo<br>de <i>Lithraea<br/>molleoides</i> en<br>úlcera gástrica en<br>ratas                                                                                                        |
| F-284/17 | 8837/2017 | María,<br>Alejandra           | Evaluación<br>farmacológica y<br>toxicológica de<br>productos<br>naturales.<br>Relación<br>estructura-<br>función | María,<br>Alejandra           | Actividad<br>antiulcerosa del<br>infuso de<br><i>Baccharis<br/>grisebachii</i><br>Hieron<br>(Asteraceae)                                                                                                        |
| B-285/17 | 9534/2017 | Anzulovich<br>Ana             | Bases<br>cronobiológicas<br>del<br>envejecimiento y<br>patologías<br>relacionadas                                 | Cargnelutti<br>, Ethel        | Extracción de<br>bazo para cultivo<br>primario y puesta<br>a punto de<br>Western blot<br>para determinar<br>proteínas del<br>reloj                                                                              |

Dr.   
Fac. Q. y Farmacia  
U.N.S.L.

Sebastián Antonio Agüero  
Secretario de Ciencia y Técnica  
Fac. Q. y Farmacia  
U.N.S.L.

Corresp. Resol. N°

296 17
